# Supplementary material
Source: Springer Nature journal article supplement (https://www.springermedizin.de/resource/supplementary/13012_2012_540_MOESM3_ESM.pdf/9630000)

### Evaluating if out of date

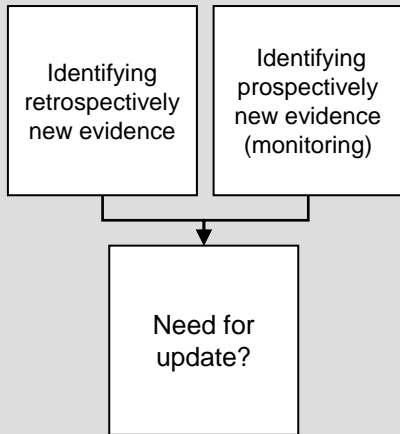

### Updating

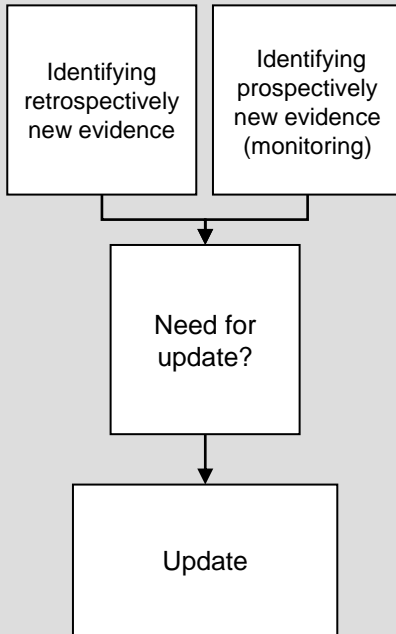

### Continuous monitoring and updating

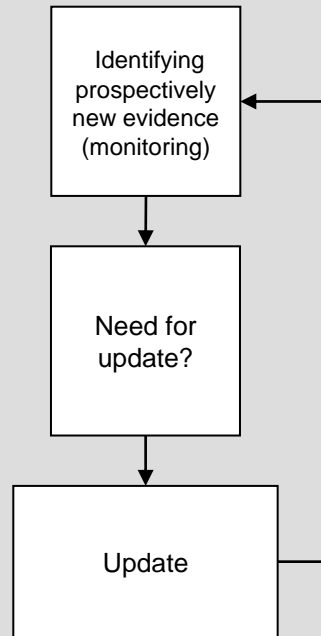

Supplement: MOESM3 [file 9630000]
